# Supplementary material for: Genome-scale CRISPR-Cas9 screen identifies druggable dependencies in TP53 wild-type Ewing sarcoma
Source: PubMed Central journal article supplement — J Exp Med. 2018 Aug 6;215(8):2137–55. doi: 10.1084/jem.20171066 (PMC6080915; doi:10.1084/jem.20171066), 2018-08-06
Supplement: JEM_20171066_sm.pdf [file JEM_20171066_sm.pdf]

## Supplemental material

Stolte et al., <https://doi.org/10.1084/jem.20171066>

Table S1 is included as a separate Excel file and shows the TP53 mutation annotations of cancer cell lines.

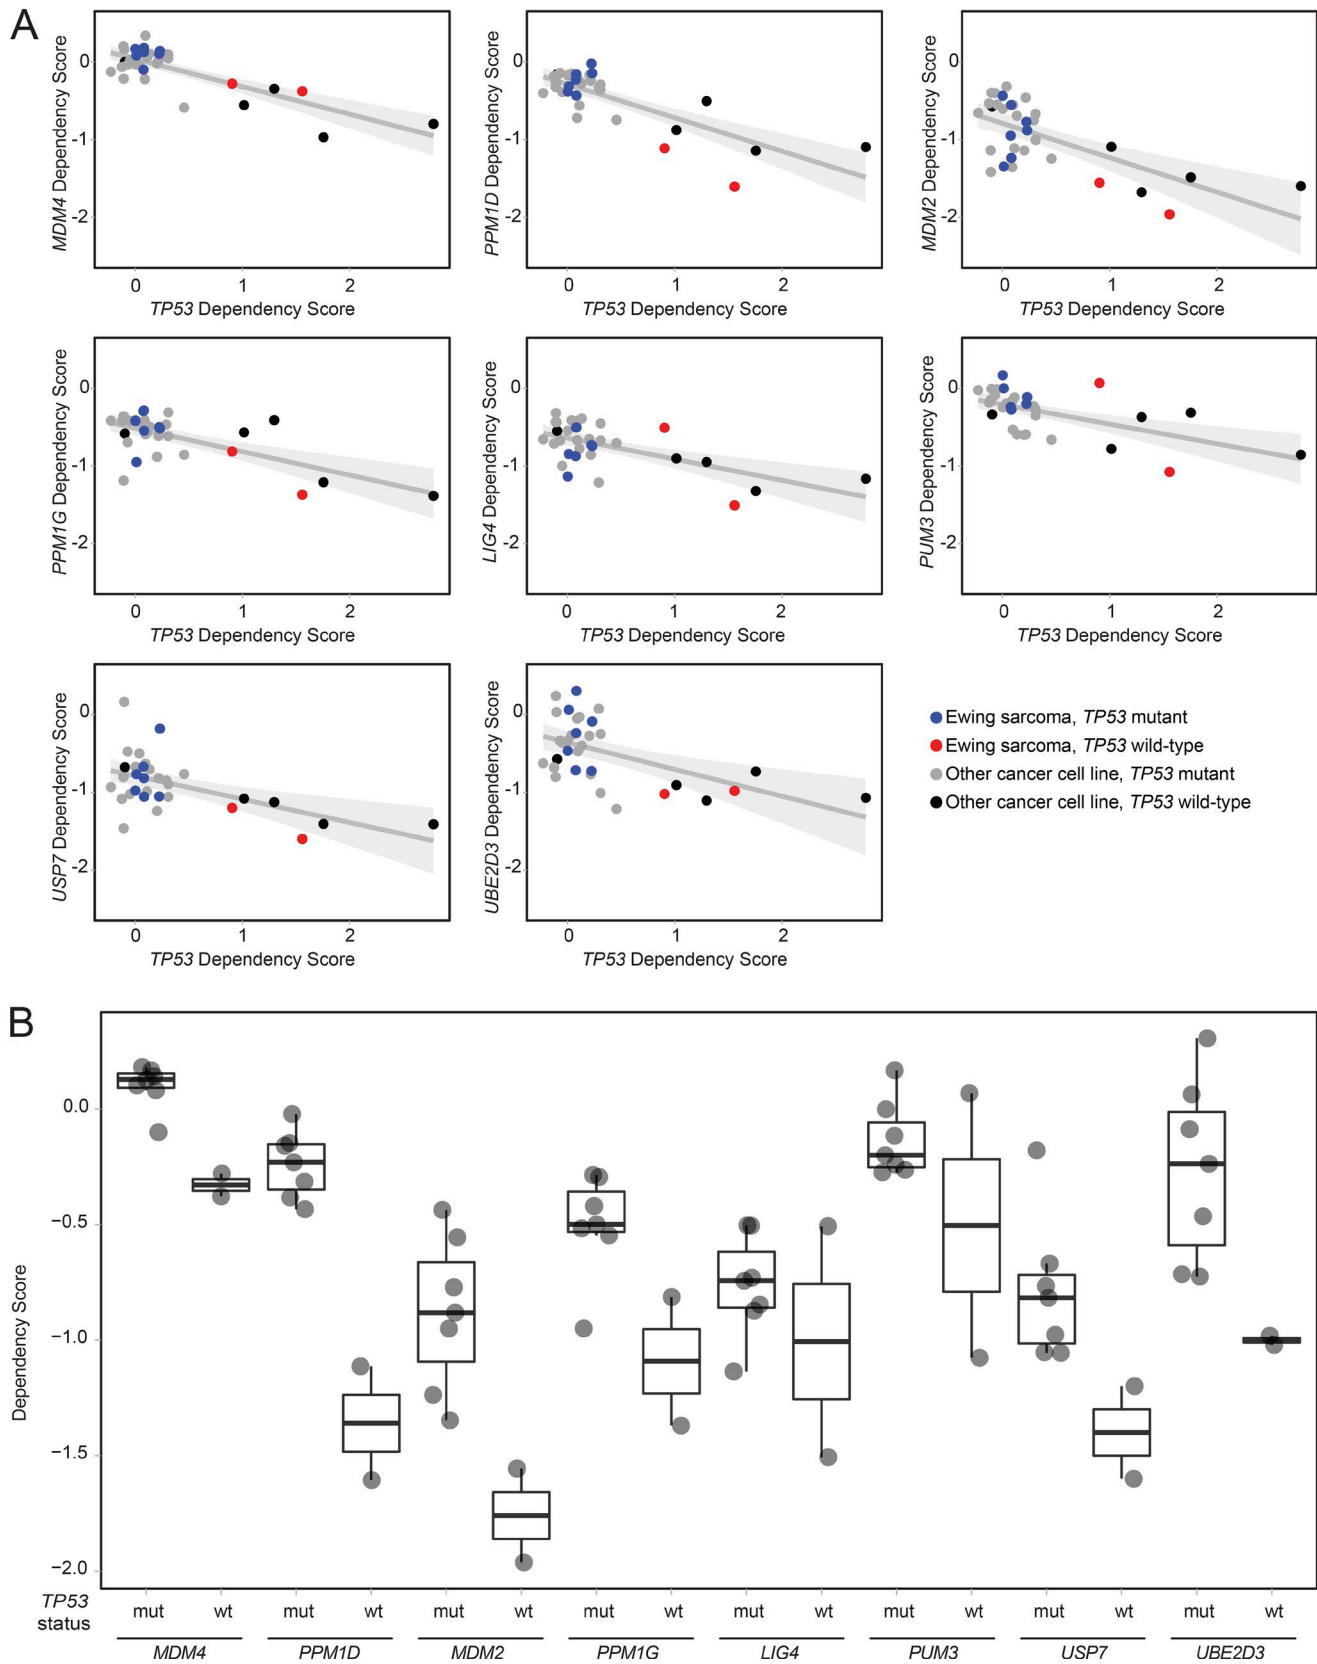

Figure S1. **Correlation of TP53 dependency with top scoring genes. (A)** Correlation of TP53 dependency scores with dependency scores of *MDM4*, *PPM1D*, *MDM2*, *PPM1G* (protein phosphatase, Mg<sup>2+</sup>/Mn<sup>2+</sup> dependent 1G), *LIG4* (DNA Ligase 4), *PUM* (pumilio RNA binding family member 3), *USP7*, and *UBE2D3* (ubiquitin conjugating enzyme E2 D3). **(B)** Comparison of dependency scores of *MDM4*, *PPM1D*, *MDM2*, *PPM1G*, *LIG4*, *PUM3*, *USP7*, and *UBE2D3* in TP53 wild-type versus TP53 mutated Ewing sarcoma cell lines (mut, mutant; wt, wild-type).
